# Supplementary material
Source: MDPI journal article supplement (https://www.mdpi.com/1999-4907/12/8/1018)
Supplement: s1 [file s1]

## Supplementary Files

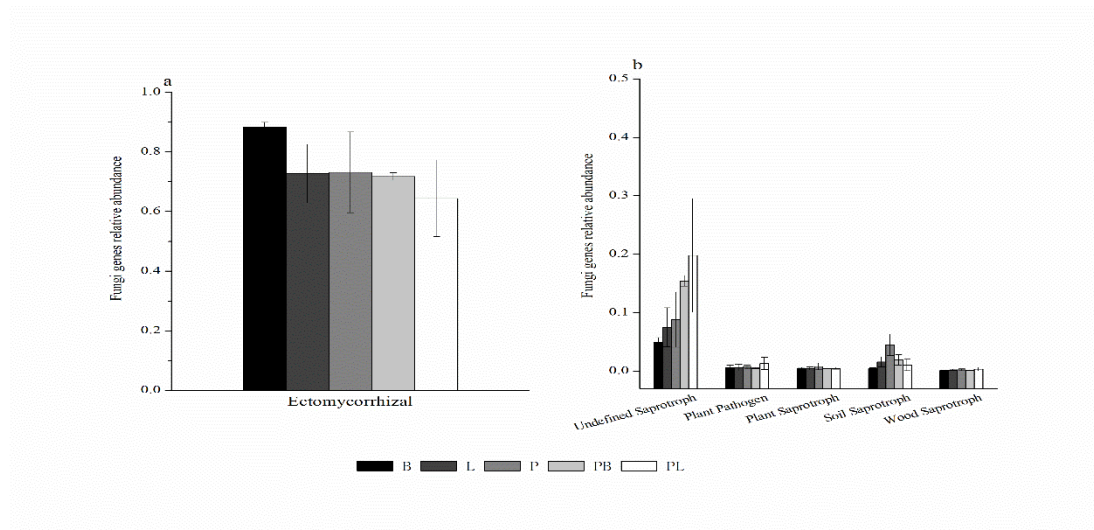

**Figure S1.** The abundance of fungi functional identified based on FunGuild database.

**Table S1** Microbiological Co-occurrent Network Analysis Group

| Microbial Co-occurrent Network | Tree Species                             | Abbreviation |
|--------------------------------|------------------------------------------|--------------|
| Monoculture plantation         | <i>Pinus sibirica</i>                    | P-L-B        |
|                                | <i>Larix gmlinii</i>                     |              |
|                                | <i>Betula platyphylla</i>                |              |
| Coniferous mixed               | <i>Pinus sibirica</i>                    | P-L-PL       |
|                                | <i>Larix gmlinii</i>                     |              |
|                                | <i>Pinus sibirica-Larix gmlinii</i>      |              |
| Coniferous-angiosperms mixed   | <i>Pinus sibirica</i>                    | P-B-PB       |
|                                | <i>Betula platyphylla</i>                |              |
|                                | <i>Pinus sibirica-Betula platyphylla</i> |              |

**Table S2** ANOSIM analysis results, based on the rank of the distance between monoculture groups and all groups.

| ANOSIM      | Fungal  |         | Bacterial |         |
|-------------|---------|---------|-----------|---------|
|             | P-value | R-value | P-value   | R-value |
| P-L-B       | 0.024   | 0.613   | 0.003     | 0.473   |
| PL-L        | 0.1     | 0.333   | 0.2       | 0.481   |
| PB-B        | 0.1     | 1       | 0.1       | 0.926   |
| L-PL-PB-P-B | 0.001   | 0.52    | 0.002     | 0.508   |

**Table S3** Number of nodes and edges in bacterial-fungal co-occurrence network.  
<sup>+</sup>, represents positive correlation; <sup>-</sup>, represents negative correlation.

|                 | P-L-B | P-L-PL | P-B-PB |
|-----------------|-------|--------|--------|
| Nodes           | 129   | 147    | 149    |
| Bacterial nodes | 76    | 94     | 95     |
| Fungal nodes    | 53    | 53     | 54     |

|                        |                                   |                                   |                                   |
|------------------------|-----------------------------------|-----------------------------------|-----------------------------------|
| Edges                  | 156                               | 180                               | 274                               |
| Fungal-Fungal          | 13 <sup>+</sup> ; 16 <sup>-</sup> | 12 <sup>+</sup> ; 6 <sup>-</sup>  | 21 <sup>+</sup> ; 12 <sup>-</sup> |
| Fungal-Bacterial       | 20 <sup>+</sup> ; 24 <sup>-</sup> | 32 <sup>+</sup> ; 29 <sup>-</sup> | 56 <sup>+</sup> ; 48 <sup>-</sup> |
| Bacterial- Bacterial   | 44 <sup>+</sup> ; 39 <sup>-</sup> | 56 <sup>+</sup> ; 45 <sup>-</sup> | 75 <sup>+</sup> ; 62 <sup>-</sup> |
| Network density        | 0.019                             | 0.017                             | 0.025                             |
| Clustering coefficient | 0.244                             | 0.185                             | 0.30                              |

---
